# Supplementary material for: Molecular and Photosynthetic Responses to Prolonged Darkness and Subsequent Acclimation to Re-Illumination in the Diatom Phaeodactylum tricornutum
Source: PubMed Central journal article supplement (PMC3592843; doi:10.1371/journal.pone.0058722), 2013-03-08
Supplement: pone.0058722.s004.pdf [file pone.0058722.s004.pdf]

| Gene          | Accession    | Orientation | Sequence                | Amplicon size |
|---------------|--------------|-------------|-------------------------|---------------|
| <i>PsaA</i>   | YP_874359    | Forward     | ATGCAGATGCTCATGACTTTGA  | 91            |
|               |              | Reverse     | TACTGATAACTGTCCAAAGTGC  |               |
| <i>PsaE</i>   | YP_874428    | Forward     | ATTGGTTTAACGAAGTCGGAAC  | 145           |
|               |              | Reverse     | TGGACTGCTAACTTCAACTAAC  |               |
| <i>PsbA</i>   | YP_874444    | Forward     | TGATATCGATGGTATTCGTGAG  | 101           |
|               |              | Reverse     | TGGATACCGATAGCATTAGAAC  |               |
| <i>PsbV</i>   | YP_874401    | Forward     | TTAATGCAACTTGTGGTGCTTG  | 121           |
|               |              | Reverse     | AACCAAACCTGCTATGTTATCG  |               |
| <i>PetB</i>   | YP_874393    | Forward     | GTTGTTGACGCATTTGCATCAG  | 98            |
|               |              | Reverse     | CACCATCATACTTGCTGACCAA  |               |
| <i>PetD</i>   | YP_874392    | Forward     | ATGGCAGCAGTTCCTTTAGGAT  | 148           |
|               |              | Reverse     | GGTACACATGCACCTATACCTA  |               |
| <i>AtpA</i>   | YP_874426    | Forward     | CGTATTGTGCAAGTTTGATGAC  | 65            |
|               |              | Reverse     | TACGAACAATTTCCGGTGTATGG |               |
| <i>AtpE</i>   | YP_874406    | Forward     | TCAAGTCGGGGTATTAGATGGT  | 141           |
|               |              | Reverse     | AACAGTAACACGATCTCGATCA  |               |
| <i>AtpB</i>   | YP_874407    | Forward     | ATTCAAGCTGTATACGTACCAG  | 70            |
|               |              | Reverse     | TCTAAATGTGCGAATGTTGTCTG |               |
| <i>ATPC</i>   | XP_002180505 | Forward     | TGGTCTCATTTCAGCGACTAGGA | 81            |
|               |              | Reverse     | CAGCAGAGTGACCTTCTTGACT  |               |
| <i>PSBP</i>   | XP_002182797 | Forward     | GCCTATCCTTCAGATGAAACGC  | 66            |
|               |              | Reverse     | CCTGGAAAGCTTCTAGTAAGCC  |               |
| <i>PSB31</i>  | XP_002180868 | Forward     | ATAAGGGAGACTTTGGCGCTGT  | 132           |
|               |              | Reverse     | GCAGCAAAGATCTTGTTAGTGG  |               |
| <i>LHCF15</i> | XP_002183381 | Forward     | TTTGATGGCTTTGACAGACTCA  | 148           |
|               |              | Reverse     | GTTCCCTCATCTCCAAATAGGAT |               |
| <i>DLST</i>   | XP_002179864 | Forward     | CTTACAGAGAAGTTTGCCGAAG  | 148           |
|               |              | Reverse     | TCATCTAATTCGTCAGAGCTGG  |               |
